# Supplementary material for: An Engineered Palette of Metal Ion Quenchable Fluorescent Proteins
Source: PubMed Central journal article supplement (PMC3994163; doi:10.1371/journal.pone.0095808), 2014-04-21
Supplement: pone.0095808.s011.pdf [file pone.0095808.s011.pdf]

Table S1. The spectrally calculated  $R_0$  and distances calculated from FRET measurements for each iq-FP/metal pair.

|               | iq-FPs/copper |                              | iq-FPs/nickel |                              | iq-FPs/cobalt |                              |
|---------------|---------------|------------------------------|---------------|------------------------------|---------------|------------------------------|
|               | $R_0$<br>(Å)  | distance<br>from FRET<br>(Å) | $R_0$<br>(Å)  | distance<br>from FRET<br>(Å) | $R_0$<br>(Å)  | distance<br>from FRET<br>(Å) |
| iq-EBFP2      | 7.2           | 7.3                          | 8.5           | 11.9                         | 11.8          | 10.9                         |
| iq-mCerulean3 | 12.3          | 11.2                         | 9.0           | 10.7                         | 14.1          | 11.1                         |
| iq-mEmerald   | 13.1          | 10.7                         | 9.2           | 13.2                         | 13.9          | 18.1                         |
| iq-mVenus     | 15.1          | 11.0                         | 10.3          | 10.4                         | 13.8          | 11.3                         |
| iq-mApple     | 18.4          | n.a.                         | 12.3          | 12.5                         | 10.7          | 13.3                         |
| iq-mKate2     | 20.0          | 18.0                         | 12.8          | 13.9                         | 10.1          | n.a.                         |
