# Supplementary material for: An Engineered Palette of Metal Ion Quenchable Fluorescent Proteins
Source: PubMed Central journal article supplement (PMC3994163; doi:10.1371/journal.pone.0095808), 2014-04-21
Supplement: pone.0095808.s012.pdf [file pone.0095808.s012.pdf]

Table S2. Data collection and refinement statistics of the iq-mEmerald crystal structures

|                                                     | apo iq-mEmerald                   | iq-mEmerald<br>(Zinc bound)       | iq-mEmerald<br>(Nickel bound)                  |
|-----------------------------------------------------|-----------------------------------|-----------------------------------|------------------------------------------------|
| <b>Data collection</b>                              |                                   |                                   |                                                |
| Space group                                         | P 4 <sub>1</sub> 2 <sub>1</sub> 2 | P 4 <sub>1</sub> 2 <sub>1</sub> 2 | P 2 <sub>1</sub> 2 <sub>1</sub> 2 <sub>1</sub> |
| Cell dimensions                                     |                                   |                                   |                                                |
| <i>a</i> , <i>b</i> , <i>c</i> (Å)                  | 72.90, 72.90, 113.97              | 72.80, 72.80, 114.9               | 51.62, 63.02, 66.35                            |
| $\alpha$ , $\beta$ , $\gamma$ (°)                   | 90.00, 90.00, 90.00               | 90.00, 90.00, 90.00               | 90.00, 90.00, 90.00                            |
| Resolution (Å)                                      | 1.75 (1.81 - 1.75)                | 1.8 (1.86 - 1.8)                  | 2.45 (2.54 - 2.45)                             |
| <i>R</i> <sub>sym</sub>                             | 0.088 (0.822)                     | 0.102 (0.765)                     | 0.174 (0.889)                                  |
| <i>I</i> / $\sigma I$                               | 18.7 (2.63)                       | 12.0 (2.07)                       | 7.55 (1.93)                                    |
| Completeness (%)                                    | 99.9 (99.8)                       | 100.0 (99.9)                      | 99.9 (98.6)                                    |
| Redundancy                                          | 8.3 (7.2)                         | 6.3 (5.5)                         | 6.9 (6.7)                                      |
| <b>Refinement</b>                                   |                                   |                                   |                                                |
| Resolution (Å)                                      | 1.75                              | 1.8                               | 2.45                                           |
| No. reflections                                     | 31878                             | 29320                             | 8272                                           |
| <i>R</i> <sub>work</sub> / <i>R</i> <sub>free</sub> | 0.170 / 0.205                     | 0.176 / 0.211                     | 0.152 / 0.225                                  |
| No. atoms                                           |                                   |                                   |                                                |
| Protein                                             | 1850                              | 1717                              | 1679                                           |
| Ligand/ion                                          | 22                                | 28                                | 23                                             |
| Water                                               | 303                               | 214                               | 83                                             |
| <i>B</i> -factors                                   |                                   |                                   |                                                |
| Protein                                             | 23.0                              | 23.8                              | 26.9                                           |
| Ligand/ion                                          | 15.7                              | 21.5                              | 24.9                                           |
| Water                                               | 36.4                              | 33.6                              | 27.2                                           |
| R.m.s deviations                                    |                                   |                                   |                                                |
| Bond lengths (Å)                                    | 0.011                             | 0.011                             | 0.013                                          |
| Bond angles (°)                                     | 1.40                              | 1.40                              | 1.52                                           |

\*Data for each structure were obtained from a single crystal
