# Supplementary material for: An Engineered Palette of Metal Ion Quenchable Fluorescent Proteins
Source: PubMed Central journal article supplement (PMC3994163; doi:10.1371/journal.pone.0095808), 2014-04-21
Supplement: pone.0095808.s013.pdf [file pone.0095808.s013.pdf]

Table S3. The dynamic range and relative fluorescence ratio change ( $R_{\max}/R_{\min}$ ) in three ratiometric metal sensors, iq-mKate2/mCerulean3, iq-mApple/mEmerald, and iq-EBFP2/mEmerald, are summarized.

| metal            | iq-mKate2/mCerulean3            |                     | iq-mApple/mEmerald              |                     | iq-EBFP2/mEmerald               |                     |
|------------------|---------------------------------|---------------------|---------------------------------|---------------------|---------------------------------|---------------------|
|                  | dynamic range ( $\mu\text{M}$ ) | $R_{\max}/R_{\min}$ | dynamic range ( $\mu\text{M}$ ) | $R_{\max}/R_{\min}$ | dynamic range ( $\mu\text{M}$ ) | $R_{\max}/R_{\min}$ |
| $\text{Cu}^{2+}$ | 0.5 - 10                        | 3.3                 | 0.5 - 5                         | 6.6                 | n.a.                            | n.a.                |
| $\text{Co}^{2+}$ | 5 - 1000                        | 1.3                 | n.a.                            | n.a.                | 0.2 - 200                       | 2.1                 |
| $\text{Ni}^{2+}$ | 2 - 1000                        | 1.5                 | 1 - 100                         | 1.8                 | 0.05 - 2                        | 1.2                 |
| $\text{Zn}^{2+}$ | 0.1 - 5                         | 1.5                 | n.a.                            | n.a.                | 0.01 - 1                        | 1.2                 |
